# Supplementary material for: Cost-Efficient Multi-GNSS Station with Real-Time Transmission for Geodynamics Applications
Source: MDPI journal article supplement (doi:10.3390/rs16060991), 2024-03-12
Supplement: s1 [file s1]

# Supporting Information for Cost-efficient multi-GNSS station with real-time transmission for geodynamics applications

Vidal, M.<sup>1</sup>; Jarrin, P.<sup>1\*</sup>; Rolland, L.<sup>1</sup>; Nocquet J.-M.<sup>1,2</sup>; Vergnolle M.<sup>1</sup>; and Sakic P.<sup>2</sup>

Université Côte d'Azur, IRD, CNRS, Observatoire de la Côte d'Azur, Géoazur, 06560 Valbonne, France.  
Université Paris Cité, Institut de Physique du Globe de Paris, Paris, France.

The supporting figures provided herein help to illustrate the results of the main text.

TIME SERIES: GPS constellation

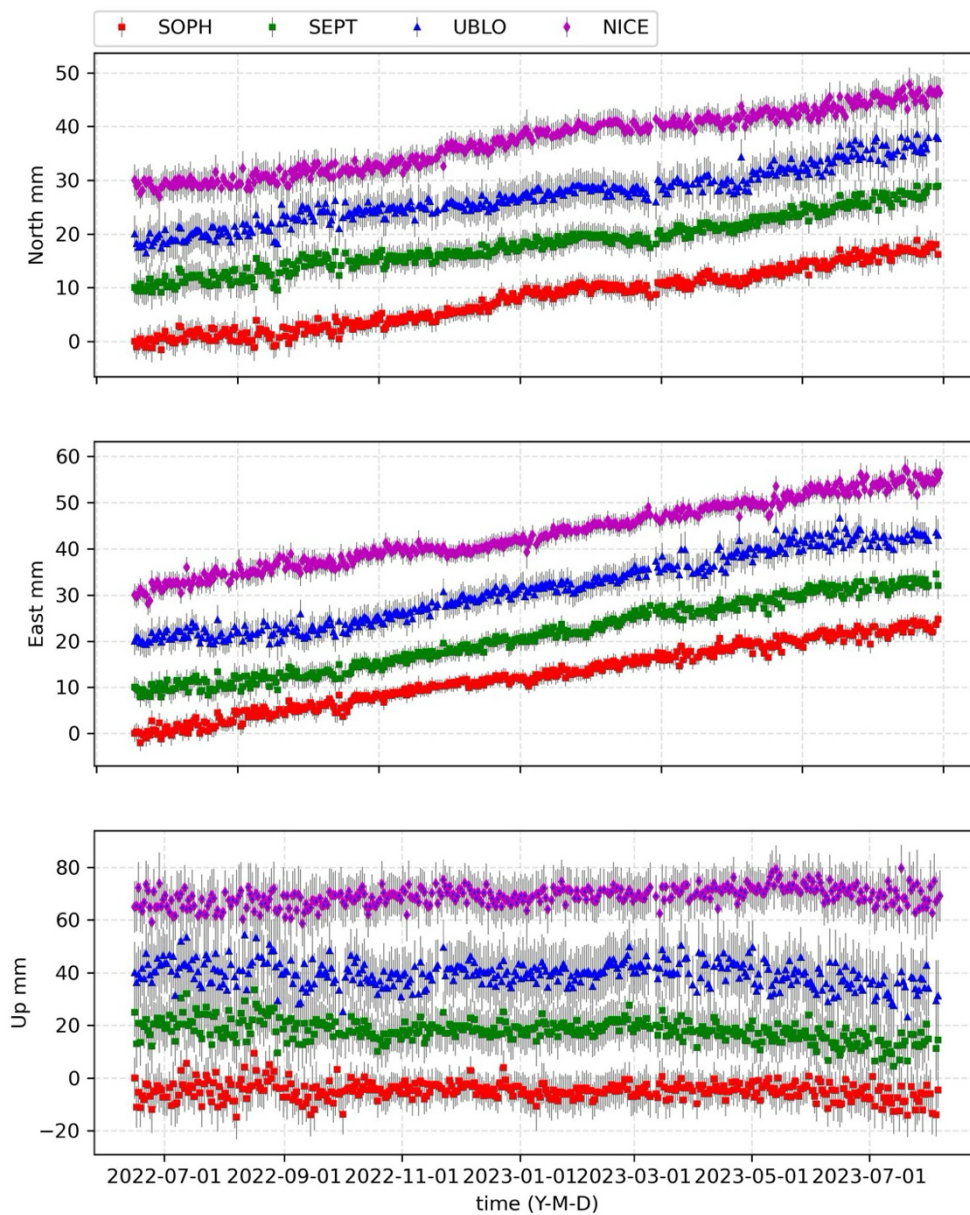

**Figure S1:** Daily position time series relative to ITRF14 for the NICE, SOPH, SEPT, and UBLO sites. The time series corresponds to the solution of the GPS constellation, estimated with the Gamit & Globk software (ver 10.71).

### Time Series: GLONASS constellation

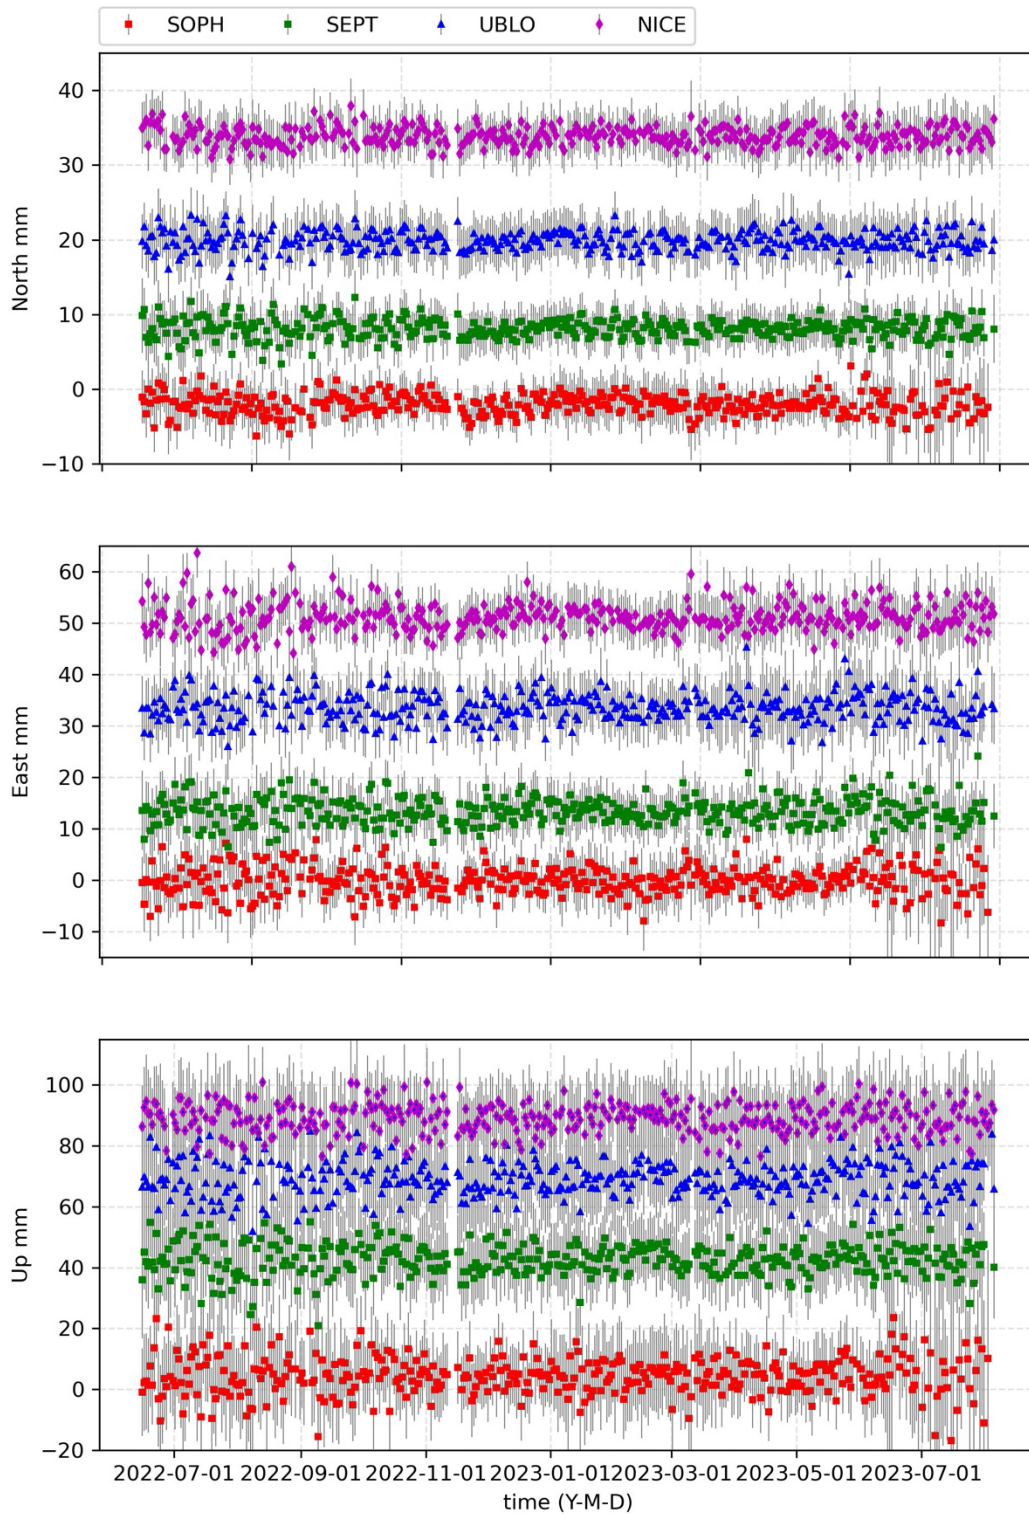

**Figure S2:** Detrended daily position time series relative to ITRF14 for the NICE, SOPH, SEPT, and UBLO sites. The time series corresponds to the solution of the GLONASS constellation, estimated with the Gamit & Globk software (ver 10.71).

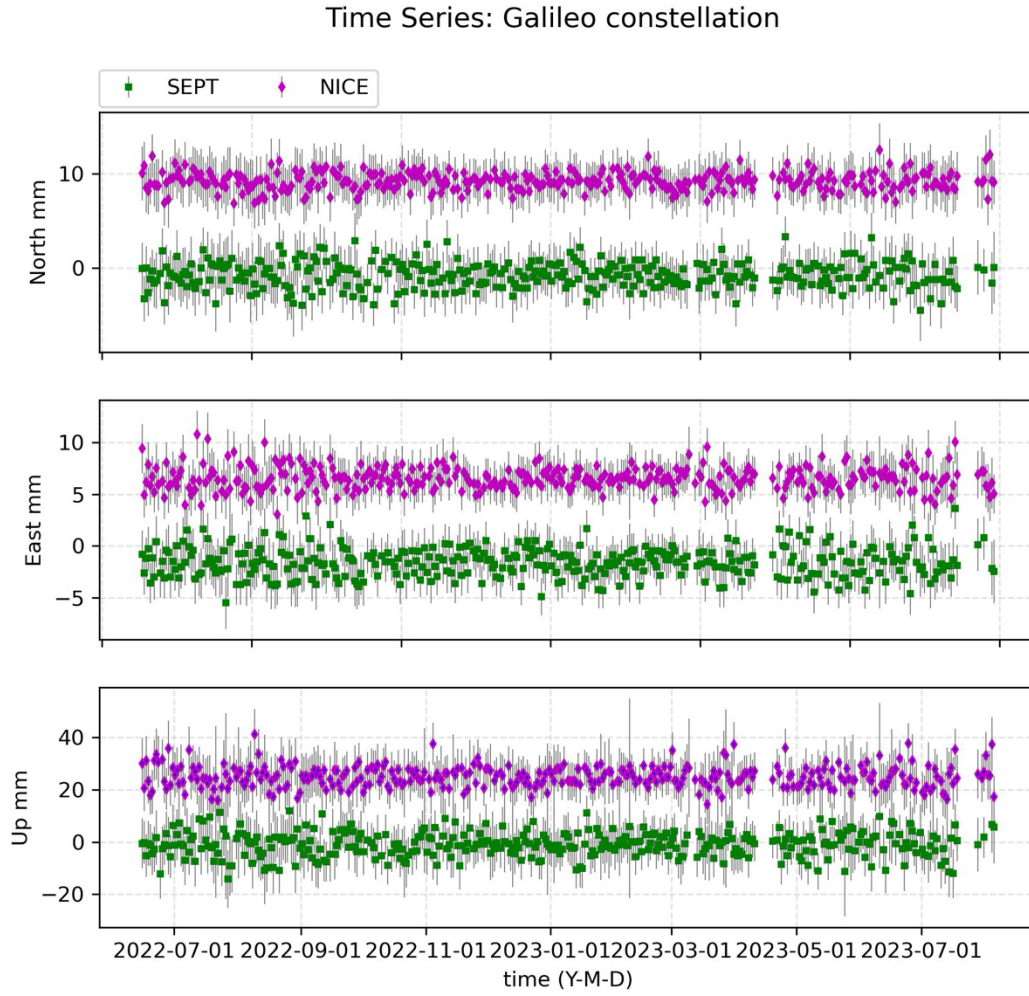

**Figure S3:** Detrended daily position time series relative to ITRF14 for the NICE and SEPT sites. The time series corresponds to the solution of the Galileo constellation, estimated with the Gamit & Globk software (ver 10.71).

**Table S1:** Summary of residual values from the low-cost and high-class geodetic stations described in the main text and other high-class geodetic stations used to process GNSS observations from Gamit & Globk. The time interval used to estimate wms values is over 1.1 years of observations, as described in the main text.

| Site | Longitude | Latitude | WRMS (mm/yr) |     |      |         |     |     |         |     |      |
|------|-----------|----------|--------------|-----|------|---------|-----|-----|---------|-----|------|
|      |           |          | GPS          |     |      | GLONASS |     |     | Galileo |     |      |
|      |           |          | N            | E   | U    | N       | E   | U   | N       | E   | U    |
| SOPH | 7.0541    | 43.6114  | 1.0          | 1.2 | 2.9  | 2.1     | 2.7 | 6.9 |         |     |      |
| SEPT | 7.0540    | 43.6114  | 1.1          | 1.5 | 4.1  | 2.0     | 2.8 | 7.2 | 1.5     | 2.1 | 4.5  |
| UBLO | 7.0540    | 43.6114  | 2.5          | 1.7 | 5.2  | 2.3     | 3.8 | 7.2 |         |     |      |
| NICE | 7.3000    | 43.7255  | 1.9          | 1.2 | 3.2  | 1.6     | 3.5 | 6.3 | 1.2     | 2.5 | 6.0  |
| TLSG | 1.4850    | 43.5497  | 2.0          | 1.0 | 2.3  | 1.9     | 3.6 | 7.0 | 0.9     | 1.0 | 6.7  |
| MARS | 5.3530    | 43.2788  | 3.4          | 3.2 | 5.8  | 1.5     | 5.6 | 8.5 | 3.0     | 2.0 | 11.4 |
| REDU | 5.1449    | 50.0015  | 1.6          | 1.4 | 4.0  | 1.9     | 3.2 | 4.5 | 2.6     | 1.8 | 14.4 |
| MICH | 5.7174    | 43.9242  | 1.0          | 1.1 | 3.3  | 1.7     | 4.3 | 4.3 |         |     |      |
| RABU | 6.9771    | 44.2678  | 1.7          | 2.4 | 4.3  | 2.3     | 6.9 | 7.4 | 2.4     | 3.2 | 6.5  |
| KOS1 | 5.8182    | 52.1734  | 1.1          | 1.1 | 3.2  | 2.6     | 2.4 | 5.9 | 0.9     | 1.3 | 4.3  |
| PADO | 11.8961   | 45.4112  | 1.1          | 1.6 | 3.2  | 1.5     | 2.1 | 3.2 | 2.0     | 1.6 | 3.6  |
| BZR2 | 11.3382   | 46.4958  | 1.5          | 1.5 | 3.3  | 1.2     | 3.6 | 5.3 | 0.9     | 1.5 | 4.9  |
| BRST | -4.4966   | 48.3805  | 2.3          | 1.9 | 10.7 | 3.1     | 2.6 | 4.6 | 2.2     | 2.4 | 7.4  |
| VILL | -3.9520   | 40.4436  | 1.2          | 1.0 | 7.1  | 2.4     | 4.1 | 6.0 | 1.2     | 3.3 | 4.8  |
